# Supplementary material for: Mutation-Dependent Pathomechanisms Determine the Phenotype in the Bestrophinopathies
Source: PubMed Central journal article supplement (PMC7084480; doi:10.3390/ijms21051597), 2020-02-26
Supplement: ijms-21-01597-s001.pdf [file ijms-21-01597-s001.pdf]

# **Mutation-dependent pathomechanisms determine the phenotype in the bestrophinopathies**

Anna-Lena Nachtigal<sup>1\*</sup>, Andrea Milenkovic<sup>1\*</sup>, Caroline Brandl<sup>1,2,3</sup>, Heidi L. Schulz<sup>1</sup>, Lisa M. J. Duerr<sup>1</sup>, Gabriele E. Lang<sup>4</sup>, Charlotte Reiff<sup>5</sup>, Philipp Herrmann<sup>6</sup>, Ulrich Kellner<sup>7</sup>, Bernhard H.F. Weber<sup>1</sup>

## **Supplementary Information**

This file contains Supplementary Figures S1 to S5 (including Supplementary Figure Legends) and Supplementary Tables S1 to S6 (including Supplementary Table headings).

## Supplementary Figure S1

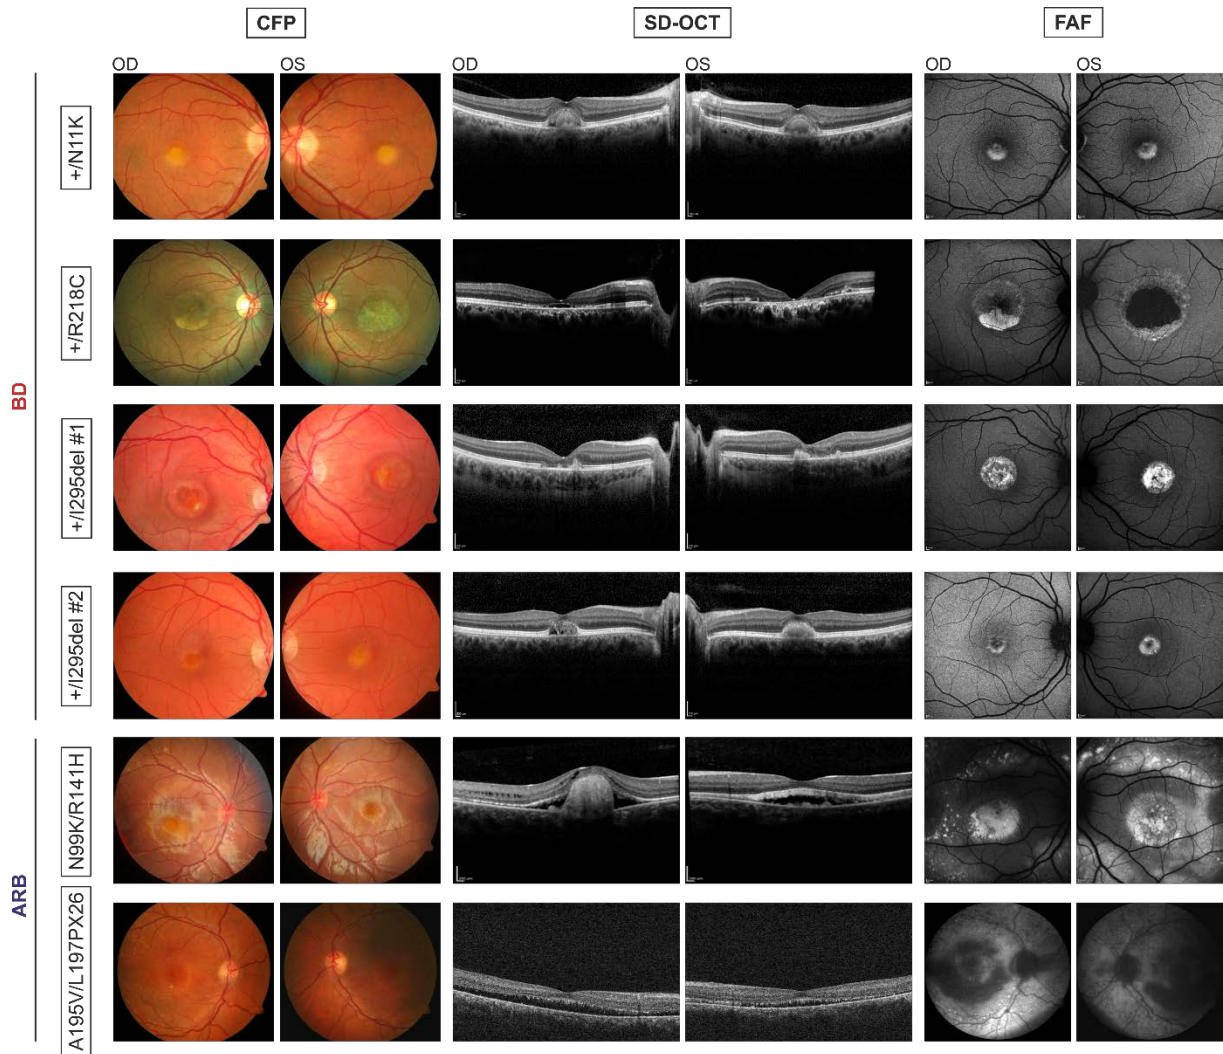

**Fig. S1. Multimodal retinal imaging of patients included in the in-vitro iPSC-RPE modelling.**

Color fundus images (CFP) of right (OD) and left (OS) eyes reveal the typical, bilateral, central, round, yellowish, vitelliform lesions in four patients with BD (+/N11K, +/R218C, +/I295del #1 and I295del #2). Patient with genotype +/R218C shows a pseudohypopyon stage on the right and central atrophy on the left eye. Patient with genotype +/N11K presents with a small peripheral lesion in each eye. Both ARB patients N99K/R141H and A195V/L198PX26 reveal smaller yellowish central lesions and multiple fleck-like yellowish deposits disseminated along the upper and lower vascular arcades. Foveal horizontal Spectral Domain-Optical Coherence Tomography (SD-OCT) scans of right and left eyes visualize hyperreflective subretinal material

deposits corresponding to the vitelliform material in two of the four patients with BD (+/N11K and +/I295del #1). In the right eye of +/N11K and +/I295del #1 the solid material is partially resorbed. A complete resorption of vitelliform material is seen in the right eye of +/R218C, leaving behind an optically empty subretinal cavity that is in line with the less pronounced yellowish lesions on CFP. SD-OCT further reveals central atrophy in both eyes of +/I295del #2 and in the left eye of +/R218C. Both patients with ARB genotype N99K/R141H and A195V/L197PX26 show a central likely serous detachment of the neurosensory retina as well as small subretinal deposits. Additionally, the right eye of ARB patient N99K/R141H reveals a large central accumulation of subretinal material as well as intraretinal cysts. Fundus autofluorescence (FAF) images of right and left eyes depict a distinct increase of autofluorescence corresponding to the vitelliform material in the RPE in four patients with BD (+/N11K, +/R218C right eye, +/I295del #1 and +/I295del #2). FAF of the left eye of +/R218C demonstrates hypofluorescence corresponding to the central atrophy. ARB patients N99K/R141H and A195V/L197PX26 exhibit a fleck-like increase mixed with a decreased autofluorescence along the upper and lower vascular arcades. Patient N99K/R141H reveals a pronounced central increase and A195V/L197PX26 revealed no structural retinal changes on FAF. Please note that detailed patient information on BD patients +/Q238R and +/A243V [1] and ADVIRC patients +/V86M [2] was given previously.

## Supplementary Figure S2

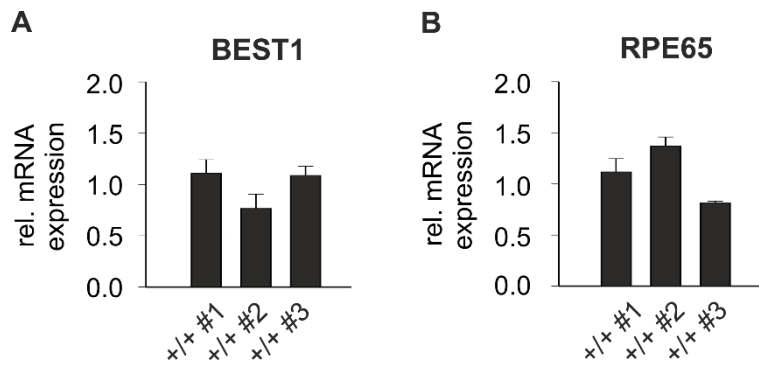

**Fig. S2. mRNA expression in independent clones of control hiPSC-RPE cell lines.** Quantitative real-time RT-PCR (qRT-PCR) analysis of (A) BEST1 and (B) RPE65 in independent clones of control hiPSC-RPE cell lines. RNA was extracted from hiPSC-RPE samples (n = 3) and qRT-PCR was performed in triplicates. Expression was normalized to HPRT1. Data were given as mean  $\pm$  SD. A summary of hiPSC clones used in these experiments is given in **Supplementary Table S4**.

### Supplementary Figure S3

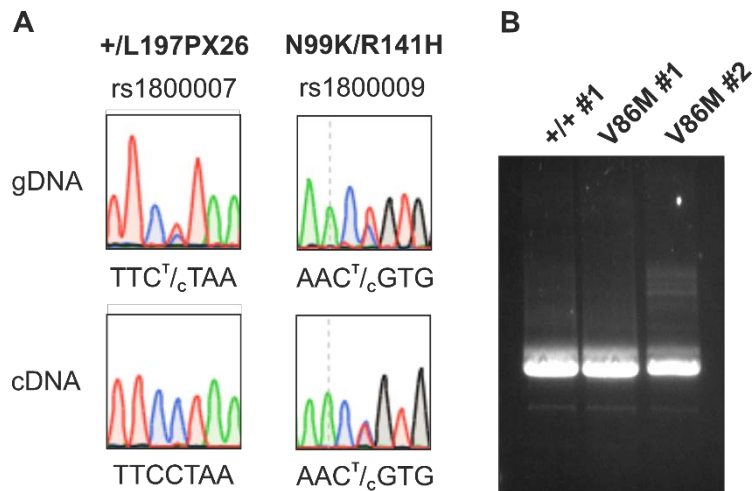

**Fig. S3. Analysis of ARB-associated premature stop codon p.(L197PX26) and of splicing effect of ADVIRC-associated mutation p.(V86M).**

(A) RNA expression of BEST1 in samples from ARB-associated hiPSC-RPE cell lines heterozygous for single nucleotide polymorphisms rs1800007 and rs1800009 located in the coding region of the *BEST1* gene. Relative expression of BEST1 was analyzed by semi-quantitative sequencing of allele-specific transcripts. Heterozygous alleles at the *BEST1* gene locus in ARB-parent +/L197PX26 and ARB-patient N99K/R141H as determined by genomic sequencing of variants rs1800007 in exon 2 (left) and rs1800009 in exon 10 (right) of the *BEST1* gene, respectively. RT-PCR analyses of the same samples reveal exclusively the presence of the normal BEST1 allele in parent +/L197PX26 whereas both alleles are present in patient N99K/R141H. (B) RT-PCR amplification of the full-length BEST1 transcript from cDNA samples obtained from hiPSC-RPEs of control (+/+ #1) and the two ADVIRC patients (V86M #1 and V86M #2) reveal the correct amplicon of 1.7 kb indicating normal splicing of exon 4. Fig. (B) PCR amplification of full-length BEST1 from cDNA samples produced from hiPSC-RPEs of control (+/+ #1) and the two ADVIRC patients (V86M #1 and V86M #2) revealed only the correct amplicon of 1.7 kb indicating normal splicing of exon 4.

## Supplementary Figure S4

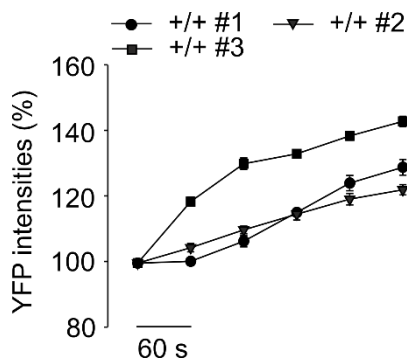

**Fig. S4. BEST1-mediated anion permeability in individual control hiPSC-RPE cell lines.**

Kinetic of YFP fluorescence intensities over time in hiPSC-RPEs from three independent control hiPSC-RPE cell lines (+/+ #1, +/+ #2, +/+ #3). Recordings were taken at indicated time points after initial exposure to  $I^-$  in the presence of the calcium ionophore A23187 followed by the addition of  $Cl^-$  containing solution. Mean values are given as mean  $\pm$  SE from six to eighteen technical replicates per individual sample (n = 3 - 4). A summary of hiPSC clones used in experiments of Fig. S4 is shown in **Supplementary Table S4**.

## Supplementary Figure S5

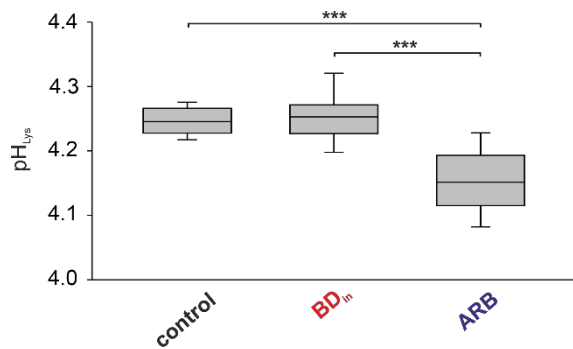

### Fig. S5. Baseline lysosomal pH (pH<sub>Lys</sub>) in control, BD<sub>IN</sub> and ARB hiPSC-RPE cell lines

Box plot showing mean values of baseline pH<sub>Lys</sub> in hiPSC-RPEs from +/+ #1 and #2 (control), +/Q238R and +/I295del #2 (BD<sub>IN</sub>) and the two ARB patients A195V/L197PX26 and N99K/R141H. Ratios of fluorescence excited at 385 nm and 330 nm were determined through fluorescence measurements on a plate reader using the ratiometric indicator dye LysoSensor™ Yellow/Blue DND-160. Absolute values of pH<sub>Lys</sub> were calculated relative to a standard curve for each cell line. Mean values are given as mean ± SD from five technical replicates per individual sample (n = 2 per phenotype). Statistical analysis was performed applying Kruskal-Wallis test for non-normal data, following post-hoc Dunn's multiple comparisons test including Benjamini-Hochberg procedure: \*\*\* = p < 0.001. A summary of hiPSC clones used in experiments of Fig. S5 is shown in **Supplementary Table S4**.

## References

1. Milenkovic, A.; Brandl, C.; Milenkovic, V. M.; Jendryke, T.; Sirianant, L.; Wanitchakool, P.; Zimmermann, S.; Reiff, C. M.; Horling, F.; Schrewe, H.; Schreiber, R.; Kunzelmann, K.; Wetzel, C. H.; Weber, B. H., Bestrophin 1 is indispensable for volume regulation in human retinal pigment epithelium cells. *Proceedings of the National Academy of Sciences of the United States of America* 2015, 112, (20), E2630-9.
2. Kellner, S.; Stohr, H.; Fiebig, B.; Weinitz, S.; Farmand, G.; Kellner, U.; Weber, B. H., Fundus Autofluorescence and SD-OCT Document Rapid Progression in Autosomal Dominant Vitreoretinopathy (ADVIRC) Associated with a c.256G > A Mutation in BEST1. *Ophthalmic genetics* 2016, 37, (2), 201-8.

**Supplementary Table S1.** Highlighted mutations in the 3D structure model of chicken Best1.

| Disease | Nucleotide exchange | Amino acid exchange |
|---------|---------------------|---------------------|
| BD      | c.4A>G              | T2A                 |
| BD      | c.16A>C             | T6P                 |
| BD      | c.25G>A             | V9M                 |
| BD      | c.28G>A             | A10T                |
| BD      | c.33T>G             | N11K                |
| BD      | c.47C>T             | S16F                |
| BD      | c.50T>G             | F17C                |
| BD      | c.61C>G             | L21V                |
| BD      | c.72G>T             | W24C                |
| BD      | c.73C>T             | R25W                |
| BD      | c.89A>G             | K30R                |
| BD      | c.240C>A            | F80L                |
| BD      | c.241G>A            | V81M                |
| BD      | c.244C>G            | L82V                |
| BD      | c.250T>G            | F84V                |
| BD      | c.253T>C            | Y85H                |
| BD      | c.272C>T            | T91I                |
| BD      | c.274C>A            | R92S                |
| BD      | c.279G>C            | W93C                |
| BD      | c.286C>G            | Q96E                |
| BD      | c.299T>G            | L100R               |
| BD      | c.313C>G            | R105G               |
| BD      | c.324C>G            | S108R               |
| BD      | c.399C>G            | N133K               |
| BD      | c.403G>A            | G135S               |
| BD      | c.431G>A            | S144N               |
| BD      | c.436_437delinsAA   | A146K               |
| BD      | c.583_584insTGG     | K194_A195insV       |
| BD      | c.652C>T            | R218C               |
| BD      | c.662G>T            | C221F               |
| BD      | c.670C>A            | L224M               |
| BD      | c.679T>A            | Y227N               |
| BD      | c.684C>G            | D228E               |
| BD      | c.695T>A            | I232N               |
| BD      | c.698C>T            | P233L               |
| BD      | c.703G>A            | V235M               |
| BD      | c.710C>G            | T237R               |
| BD      | c.722C>A            | T241N               |
| BD      | c.728C>T            | A243V               |



Supplementary Table S1. cont'd

| Disease | Nucleotide exchange | Amino acid exchange |
|---------|---------------------|---------------------|
| BD      | c.877C>A            | Q293K               |
| BD      | c.880C>G            | L294V               |
| BD      | c.884_886delTCA     | I295del             |
| BD      | c.886A>C            | N296H               |
| BD      | c.889C>G            | P297A               |
| BD      | c.892T>G            | F298V               |
| BD      | c.900G>C            | E300D               |
| BD      | c.903T>G            | D301E               |
| BD      | c.904G>A            | D302N               |
| BD      | c.910_912delGAT     | D304del             |
| BD      | c.914T>C            | F305S               |
| BD      | c.917A>G            | E306G               |
| BD      | c.920C>T            | T307I               |
| BD      | c.925T>C            | W309R               |
| BD      | c.929T>C            | I310T               |
| BD      | c.932T>G            | V311G               |
| ARB     | c.38G>A             | R13H                |
| ARB     | c.122T>C            | L41P                |
| ARB     | c.139C>T            | R47C                |
| ARB     | c.297C>A            | N99K                |
| ARB     | c.400C>G            | L134V               |
| ARB     | c.422G>A            | R141H               |
| ARB     | c.454C>G            | P152A               |
| ARB     | c.488T>G            | M163R               |
| ARB     | c.536_538delACA     | N179del             |
| ARB     | c.584C>T            | A195V               |
| ARB     | c.763C>T            | R255W               |
| ARB     | c.821C>G            | P274R               |
| ARB     | c.830C>T            | T277M               |
| ARB     | c.848_850delTCT     | F283del             |
| ARB     | c.949G>A            | V317M               |
| ARB     | c.974T>C            | M325T               |
| ADVIRC  | c.248G>C            | G83D                |
| ADVIRC  | c.256G>A            | V86M                |
| ADVIRC  | c.704T>C            | V235A               |
| ADVIRC  | c.707A>G            | Y236C               |
| ADVIRC  | c.715G>A            | V239M               |

**Supplementary Table S2.** Summary of clinical information of patients with different forms of bestrophinopathies and their relatives included in the *in-vitro* iPSC-RPE modelling.

| BEST1<br>Genotype | Age <sup>a</sup><br>[years] | Visual<br>acuity<br>[logMAR] |      | EOG<br>[Arden ratio] |                    | ERG                                                                                                                                          |                                                                                                                                                                  |
|-------------------|-----------------------------|------------------------------|------|----------------------|--------------------|----------------------------------------------------------------------------------------------------------------------------------------------|------------------------------------------------------------------------------------------------------------------------------------------------------------------|
|                   |                             | OD                           | OS   | OD                   | OS                 | OD                                                                                                                                           | OS                                                                                                                                                               |
| <b>BD</b>         |                             |                              |      |                      |                    |                                                                                                                                              |                                                                                                                                                                  |
| +/N11K            | 59 (59)                     | 0.2                          | 0.2  | 1.1                  | 1.3                | Fullfield ERG: normal photopic amplitudes/peak times; multifocal ERG: normal                                                                 | Fullfield ERG: normal photopic amplitudes/peak times; multifocal ERG: normal                                                                                     |
| +/R218C           | 50 (43)                     | 1.0                          | 1.3  | 1.3                  | 1.3                | Fullfield ERG: normal photopic amplitudes/peak times                                                                                         | Fullfield ERG: normal photopic amplitudes/peak times                                                                                                             |
| +/I295del #1      | 50 (45)                     | 0.3                          | 0.1  | NA                   | NA                 | Fullfield ERG: normal photopic cone response                                                                                                 | Fullfield ERG: normal photopic cone response                                                                                                                     |
| +/I295del #2      | 17 (16)                     | 0.7                          | 0.4  | Missing light peak   | Missing light peak | NA                                                                                                                                           | NA                                                                                                                                                               |
| <b>ARB</b>        |                             |                              |      |                      |                    |                                                                                                                                              |                                                                                                                                                                  |
| N99K/R141H        | 6 (NA)                      | 0.1                          | 0.1  | Missing light peak   | Missing light peak | Fullfield ERG: scotopic amplitudes reduced at higher flash intensities; multifocal ERG: central and paracentral amplitude reduction          | Fullfield ERG: scotopic amplitudes reduced at higher flash intensities, photopic amplitudes reduced; multifocal ERG: central and paracentral amplitude reduction |
| +/R141H           | 47 (NA)                     | -0.1                         | -0.1 | 2.4                  | 2.0<br>(normal)    | Fullfield ERG: normal; multifocal ERG: normal                                                                                                | Fullfield ERG: normal; multifocal ERG: normal                                                                                                                    |
| A195V/L197PX26    | 26 (24)                     | 0.3                          | 0.3  | 1.3                  | 1.3                | Fullfield ERG: photopic normal latency and amplitude, scotopic normal latency, reduced amplitude; multifocal ERG: reduced central amplitudes | Fullfield ERG: photopic normal latency and amplitude, scotopic normal latency, reduced amplitude; multifocal ERG: reduced central amplitudes                     |
| +/A195V           | 53 (NA)                     | 0.0                          | 0.0  | 2.5                  | 2.2                | NA                                                                                                                                           | NA                                                                                                                                                               |
| +/L197PX26        | 54 (NA)                     | 0.0                          | 0.0  | 2.7                  | 2.2                | NA                                                                                                                                           | NA                                                                                                                                                               |
| <b>ADVIRC</b>     |                             |                              |      |                      |                    |                                                                                                                                              |                                                                                                                                                                  |
| +/V86M #1         | 50 (45)                     | 0.2                          | LP   | NA                   | NA                 | NA in late stage (see patient II:4 in Kellner et al., 2016)                                                                                  | NA in late stage (see patient II:4 in Kellner et al., 2016)                                                                                                      |
| +/V86M #2         | 17 (16)                     | 0.0                          | 0.0  | 1.1                  | 1.0                | NA in later stage (see patient III:2 in Kellner et al., 2016)                                                                                | NA in late stage (see patient II:4 in Kellner et al., 2016)                                                                                                      |

logMAR = logarithm of the Minimum Angle of Resolution; EOG = electro-oculogram; ERG = electro-retinogram; OD = right eye; OS = left eye; NA = not available; BD = Best disease; ARB = autosomal recessive bestrophinopathy; ADVIRC = autosomal dominant vitreoretinopathopathy; LP = light peak;

<sup>a</sup>) Age at harvesting of skin biopsy (age at initial diagnosis).

**Supplementary Table S3.** Transepithelial electrical resistance (TER) of hiPSC-RPE cell lines after five weeks growth on transwell inserts.

| BEST1 Genotype | iPSC clone | TER ( $\Omega \cdot \text{cm}^2$ ) |
|----------------|------------|------------------------------------|
| +/+ #1         | MK#22      | 647 $\pm$ 39                       |
|                | MK#27b     | 1194 $\pm$ 66                      |
| +/+ #2         | AM#13      | 755 $\pm$ 83                       |
|                | AM#260     | 884 $\pm$ 75                       |
| +/+ #3         | NG         | 868 $\pm$ 81                       |
| +/N11K         | MW#232     | 777 $\pm$ 73                       |
| +/R218C        | MO#214     | 1072 $\pm$ 56                      |
| +/A243V        | SK#16      | 855 $\pm$ 86                       |
| +/Q238R        | DK#Pka     | 1089 $\pm$ 136                     |
| +/I295del #1   | AP#187     | 661 $\pm$ 54                       |
| +/I295del #2   | MD#18      | 634 $\pm$ 124                      |
| N99K/R141H     | LA#29      | 1081 $\pm$ 79                      |
|                | LA#33      | 1435 $\pm$ 125                     |
| +/R141H        | MA#77      | 1160 $\pm$ 35                      |
| A195V/L197PX26 | TT#178     | 849 $\pm$ 72                       |
|                | TT#180     | 809 $\pm$ 60                       |
| +/A195V        | PT#172     | 698 $\pm$ 64                       |
|                | PT#176     | 779 $\pm$ 88                       |
| +/L197PX26     | AT#166     | 1116 $\pm$ 34                      |
|                | AT#168     | 960 $\pm$ 44                       |
| +/V86M #1      | IS#53a     | 595 $\pm$ 54                       |
|                | IS#53b     |                                    |
| +/V86M #2      | JS#52a     | 621 $\pm$ 99                       |
|                | JS#52b     |                                    |

TER = transepithelial electrical resistance

**Supplementary Table S4.** iPSC clones generated from patient fibroblasts and allocation to tables and figures.

| Figure/Table | Description                                                                                                                            | Used iPSC-clone                                                                                                                                                                                   |
|--------------|----------------------------------------------------------------------------------------------------------------------------------------|---------------------------------------------------------------------------------------------------------------------------------------------------------------------------------------------------|
| Fig. 2A      | Confocal immunofluorescence images of monolayers from hiPSC-RPE cells                                                                  | Control: MK#22; BD: MW#232, MO#214, SK#16, DK#Pka, AP#187, MD#18; ARB: LA#33, MA#77, TT#180, PT#172, AT#168; ADVIRC: IS#53a, JS#52a                                                               |
| Fig. 2B, C   | Quantification of BEST1 and RPE65 expression by qRT-PCR from hiPSC-RPE cells                                                           | Control: MK#27b; BD: MW#232, MO#214, SK#16, DK#Pka, AP#187, MD#18; ARB: LA#33, MA#77, TT#180, PT#172, AT#168; ADVIRC: IS#53a, JS#52a                                                              |
| Fig. 2D      | Representative Western Blot images of whole cell lysates from hiPSC-RPE cells                                                          | Control: MK#22; BD: MW#232, MO#214, SK#16, DK#Pka, AP#187, MD#18; ARB: LA#33, MA#77, TT#180, PT#172, AT#168; ADVIRC: IS#53a, JS#52a                                                               |
| Fig. 2E      | Quantification of BEST1 protein expression.                                                                                            | Control: MK#22; BD: MW#232, MO#214, SK#16, DK#Pka, DK#Pkb, AP#187, MD#18; ARB: LA#29, LA#33, MA#74, MA#77, TT#178, TT#180, PT#172, PT#176, AT#166, AT#168; ADVIRC: IS#53a, IS#53b, JS#52a, JS#52b |
| Fig. 3C-G    | Kinetic of YFP fluorescence intensities over time in hiPSC-RPE cells                                                                   | Control: MK#22; BD: MW#232, MO#214, SK#16, DK#Pka, AP#187, MD#18; ARB: LA#33, MA#77, TT#178, PT#176, AT#166; ADVIRC: IS#53a, JS#52a                                                               |
| Fig. 3H      | Averaged bar graphs showing recovery rated from initial levels of YFP quenching to maximum fluorescence signal.                        | Control: MK#22, AM#13, NG#1; BD: MW#232, MO#214, SK#16, DK#Pka, AP#187, MD#18; ARB: LA#33, MA#77, TT#178, PT#176, AT#166; ADVIRC: IS#53a, JS#52a                                                  |
| Fig. 4A      | Representative Western blot images of whole cell lysates from untreated and treated control and BD <sub>IN</sub> hiPSC-RPE cell lines. | Control: MK#22; BD: DK#Pka, AP#187, MD#18; ARB: LA#33, TT#180                                                                                                                                     |
| Fig. 4B      | Summary of BEST1 protein expression obtained from experiments shown in Fig4A.                                                          | BD: DK#Pka, DK#Pkb, AP#187, MD#18; ARB: LA#33, TT#180                                                                                                                                             |

## Supplementary Table S4. cont'd

|          |                                                                                                                                                |                                                                                                                                                                                                                         |
|----------|------------------------------------------------------------------------------------------------------------------------------------------------|-------------------------------------------------------------------------------------------------------------------------------------------------------------------------------------------------------------------------|
| Fig. 4C  | Representative Western blot images of whole cell lysates from untreated and treated control, BD <sub>PM</sub> and ADVIRC hiPSC-RPE cell lines. | Control: AM#260; BD: MW#232, MO#214, SK#16; ADVIRC: IS#53b, JS#52b                                                                                                                                                      |
| Fig. 4D  | Summary of BEST1 protein expression obtained from experiments shown in Fig4B.                                                                  | BD: MW#232, MO#214, SK#16; ADVIRC: IS#53b, JS#52b                                                                                                                                                                       |
| Fig. 5B  | Box plots showing lysosomal pH in hiPSC-RPE cells.                                                                                             | Control: AM#13, MK#27; BD: DK#Pka, MD#18; ARB: LA#33, TT#180                                                                                                                                                            |
| Fig. 5C  | Representative Western blot images of the analysis of CTSD maturation after POS feeding.                                                       | Control: MK#22; BD: DK#Pka, MD#18; ARB: LA#33, TT#180                                                                                                                                                                   |
| Fig. 5D  | Representative Western blot images of the analysis of CTSD maturation after treatment with CQ.                                                 | Control: MK#22; BD: DK#Pka, AP#187, MD#18; ARB: LA#29, MA#77, TT#180, AT#168, PT#172                                                                                                                                    |
| Table S4 | Transepithelial electrical resistance (TER) of hiPSC-RPE cell lines after five weeks growth on transwell inserts.                              | Control: MK#22, MK#27b, AM#13, AM#260, NG#1; BD: MW#232, MO#214, SK#16, DK#Pka, DK#Pkb, AP#187, MD#18; ARB: LA#29, LA#33, MA#77, TT#178, TT#180, PT#172, PT#176, AT#166, AT#168; ADVIRC: IS#53a, IS#53b, JS#52a, JS#52b |
| Fig. S2  | Quantification of BEST1 and RPE65 expression by qRT-PCR from additional control hiPSC-RPE cells                                                | Control: AM#13, MK#22, NG#1                                                                                                                                                                                             |
| Fig. S4  | Kinetic of YFP fluorescence intensities over time in additional control hiPSC-RPE cells                                                        | Control: AM#13, MK#22, NG#1                                                                                                                                                                                             |
| Fig. S5  | Box plots showing baseline lysosomal pH in hiPSC-RPE cells.                                                                                    | Control: AM#13, MK#22; BD: DK#Pka, MD#18; ARB: LA#33, TT#180                                                                                                                                                            |

**Supplementary Table S5.** Primer pairs for BEST1 exon amplification and subsequent sequencing.

| Name          | Sequence (5`-3`)              | Purpose                                                                                                      |
|---------------|-------------------------------|--------------------------------------------------------------------------------------------------------------|
| dogBest1-R    | cagacctgtttccaaggcc           | Amplifying of exon 10 (gDNA); sequencing of SNP rs1800009:T>C                                                |
| hBest1_F_NheI | gctagcaccatgaccatcacttacacaag | Amplifying full-length BEST1 cDNA; sequencing of control and ADVIRC cDNA (+/+ #1, I295del #1 and I295del #2) |
| hBest1_R_MluI | acgcgtttaggaatgtgcttcatccc    | Amplifying full-length BEST1 cDNA; sequencing of control and ADVIRC cDNA (+/+ #1, I295del #1 and I295del #2) |
| hVMD2-RT-R    | gactggatcagtgctcgtgctg        | Amplifying of exon 10 (cDNA) Sequencing of control and ADVIRC cDNA (+/+ #1, I295del #1 and I295del #2)       |
| mVMD2_F2      | ctgtatgcctacgactggat          | Sequencing of control and ADVIRC cDNA (+/+ #1, I295del #1 and I295del #2)                                    |
| mVMD2_F3      | agctacatccagctcatccc          | Sequencing of control and ADVIRC cDNA (+/+ #1, I295del #1 and I295del #2)                                    |
| N11K-BamHI-R  | ggatccgtggggccagacaaagcc      | Amplifying of exon 2 (gDNA), Sequencing of SNP rs1800007:T>C                                                 |
| N11K-EcoRI-F  | gaattcatccctacaaaccccccaatc   | Amplifying of exon 2 (gDNA) Sequencing of control and ADVIRC cDNA (+/+ #1, I295del #1 and I295del #2)        |
| Tu15_NEW_F3   | gagaccaactggattgtcga          | Sequencing of control and ADVIRC cDNA (+/+ #1, I295del #1 and I295del #2)                                    |
| Tu15_NEW_F4   | catgaccatcacttacacaagc        | Amplifying exon 2 (cDNA), sequencing of SNP rs1800007:T>C                                                    |
| Tu15_Race_1H  | ctttagactgcgggtgctgacg        | Amplifying of exon 2 (cDNA) Sequencing of control and ADVIRC cDNA (+/+ #1, I295del #1 and I295del #2)        |
| Tu15_Race_2   | ccacggcaggttctcgtact          | Sequencing of control and ADVIRC cDNA (+/+ #1, I295del #1 and I295del #2)                                    |
| TU15newF6     | gaagcttaaggctgtggacg          | Amplifying of exon 10 (gDNA and cDNA); sequencing of SNP rs1800009:T>C                                       |

**Supplementary Table S6.** Primer pairs and Roche Library Probes for qRT-PCR analysis

| Gene  | Species | F-Primer (5`-3`)         | R-Primer (5`-3`)       | Roche Library Probe |
|-------|---------|--------------------------|------------------------|---------------------|
| BEST1 | Human   | agctgctatatggcgagttctt   | gtgagggccagcctataaataa | 4                   |
| HPRT1 | Human   | tgaccttgattatatttgcatacc | cgagcaagacgttcagtcct   | 73                  |
| RPE65 | Human   | gccttggaagaagatgatgg     | tggcattcagaatcaggaga   | 68                  |

qRT-PCR = quantitative real-time reverse transcriptase PCR
